# Supplementary material for: An Observational Study of Pharmacological Treatment in Primary Care of Children With ADHD in the United Kingdom
Source: Atypon-hosted journal article supplement (doi:10.1176/appi.ps.201300148), 2015-03-02
Supplement: appi.ps.201300148.ds001.pdf [file appi.ps.201300148.ds001.pdf]

Publisher: APA; Journal: PS:Psychiatric Services;  
 Copyright: 2014, ; Volume: 00; Issue: 0; Manuscript: 201300148; Month: ; Year: 2014  
 DOI: 10.1176/appi.ps.201300148; TOC Head: ; Section Head: Articles  
 Article Type: Articles; Collection Codes: , ,

Read codes used to define ADHD

| Read code | Description                                               |
|-----------|-----------------------------------------------------------|
| Eu9y700   | [X]Attention deficit disorder                             |
| ZS91.12   | [X]Attention deficit disorder                             |
| Eu90011   | [X]Attention deficit hyperactivity disorder               |
| Eu90100   | [X]Hyperkinetic conduct disorder                          |
| Eu90111   | [X]Hyperkinetic disorder associated with conduct disorder |
| Eu90z00   | [X]Hyperkinetic disorder, unspecified                     |
| Eu90.00   | [X]Hyperkinetic disorders                                 |
| Eu90z12   | [X]Hyperkinetic syndrome NOS                              |
| Eu90y00   | [X]Other hyperkinetic disorders                           |
| ZS91.11   | ADD - Attention deficit disorder                          |
| ZS91.00   | Attention deficit disorder                                |
| E2E0100   | Attention deficit with hyperactivity                      |
| E2E0000   | Attention deficit without hyperactivity                   |
| E2E.00    | Child attention deficit disorder                          |
| E2E0z00   | Child attention deficit disorder NOS                      |
| E2E..00   | Childhood hyperkinetic syndrome                           |
| E2E2.00   | Hyperkinetic conduct disorder                             |
| E2Ez.00   | Hyperkinetic syndrome NOS                                 |
| 1BR..00   | Reduced concentration                                     |
| 1BR.11    | Short attention span                                      |
| Z7C5312   | Short attention span                                      |
